# Supplementary material for: Antibiotic resistance rates and physician antibiotic prescription patterns of uncomplicated urinary tract infections in southern Chinese primary care
Source: PubMed Central journal article supplement (PMC5423680; doi:10.1371/journal.pone.0177266), 2017-05-09
Supplement: pone.0177266.s001.pdf [file pone.0177266.s001.pdf]

**S1 Table. Odds ratio for clinics and antibiotic prescription (n=245).**

| <b>Antibiotic agents</b>              | <b>Clinics</b> | <b>OR (95% CI)</b> | <b>P value</b>      |
|---------------------------------------|----------------|--------------------|---------------------|
| <b>Empirical antibiotic treatment</b> | Private        | 1.00               |                     |
|                                       | Public         | 1.56 (0.85-2.86)   | 0.147               |
| <b>Amoxicillin</b>                    | Private        | 1.00               |                     |
|                                       | Public         | 2.84 (1.67-4.85)   | <0.001 <sup>a</sup> |
| <b>Ampicillin</b>                     | Private        | 1.00               |                     |
|                                       | Public         | 0.48 (0.09-2.67)   | 0.391               |
| <b>Cefuroxime</b>                     | Private        | 1.00               |                     |
|                                       | Public         | 0.14 (0.03-0.62)   | 0.003 <sup>a</sup>  |
| <b>Ciprofloxacin</b>                  | Private        | 1.00               |                     |
|                                       | Public         | 0.27 (0.11-0.71)   | 0.005 <sup>a</sup>  |
| <b>Co-trimoxazole</b>                 | Private        | 1.00               |                     |
|                                       | Public         | 1.31 (0.29-5.99)   | 0.726               |
| <b>Levofloxacin</b>                   | Private        | 1.00               |                     |
|                                       | Public         | 0.23 (0.05-1.11)   | 0.048 <sup>a</sup>  |
| <b>Nitrofurantoin</b>                 | Private        | 1.00               |                     |
|                                       | Public         | 2.01 (1.14-3.55)   | 0.015 <sup>a</sup>  |
| <b>Ofloxacin</b>                      | Private        | NA                 | <0.001 <sup>a</sup> |
|                                       | Public         |                    |                     |

<sup>a</sup>Statistically significant at  $P < 0.05$ .
