# Supplementary material for: Antibiotic resistance rates and physician antibiotic prescription patterns of uncomplicated urinary tract infections in southern Chinese primary care
Source: PubMed Central journal article supplement (PMC5423680; doi:10.1371/journal.pone.0177266), 2017-05-09
Supplement: pone.0177266.s002.pdf [file pone.0177266.s002.pdf]

**S2 Table. Odds ratio for presenting symptoms for UTI and antibiotic****prescription (n=298).**

| <b>Symptoms</b>                 | <b>Presence of symptoms</b> | <b>OR (95% CI)</b> | <b>P value</b>      |
|---------------------------------|-----------------------------|--------------------|---------------------|
| <b>Dysuria</b>                  | Absent                      | 1.00               |                     |
|                                 | Present                     | 4.53 (2.33-8.83)   | <0.001 <sup>a</sup> |
| <b>Fever</b>                    | Absent                      | 1.00               |                     |
|                                 | Present                     | 0.81 (0.09-7.38)   | 0.849               |
| <b>Frequency</b>                | Absent                      | 1.00               |                     |
|                                 | Present                     | 1.74 (0.95-3.21)   | 0.073               |
| <b>Cloudy urine</b>             | Absent                      | 1.00               |                     |
|                                 | Present                     | 1.09 (0.30-3.88)   | 0.899               |
| <b>Nocturia</b>                 | Absent                      | 1.00               |                     |
|                                 | Present                     | 0.51 (0.13-2.01)   | 0.329               |
| <b>Abdominal/loin pain</b>      | Absent                      | 1.00               |                     |
|                                 | Present                     | 1.20 (0.51-2.87)   | 0.674               |
| <b>Urgency</b>                  | Absent                      | 1.00               |                     |
|                                 | Present                     | 2.32 (1.18-4.58)   | 0.013 <sup>a</sup>  |
| <b>Haematuria</b>               | Absent                      | 1.00               |                     |
|                                 | Present                     | 0.96 (0.42-2.21)   | 0.931               |
| <b>No of the above symptoms</b> | 1-2 symptoms                | 1.00               |                     |
|                                 | >2 symptoms                 | 0.33 (0.16-0.69)   | 0.003 <sup>a</sup>  |

<sup>a</sup>Statistically significant at  $P<0.05$ .
